# Supplementary material for: Identifying Complex lncRNA/Pseudogene-miRNA-mRNA Crosstalk in Hormone-Dependent Cancers
Source: Preprints.org preprint supplement (doi:10.20944/preprints202109.0337.v1), 2021-09-20
Supplement: Supplementary file 3 [file TableS3.docx]

Table S3. A detailed list of long non-coding RNA-mRNA-microRNAs identified from both GDCRNATools and SPONGE (Sparse Partial correlation ON Gene Expression).

| **lncRNAs** | **Genes** | **Number of shared miRNAs** | **miRNAs** |
| --- | --- | --- | --- |
| MAGI2-AS3 | *DNAJB4* | 12 | hsa-miR-148a-3p, hsa-miR-152-3p, hsa-miR-148b-3p, hsa-miR-15a-5p, hsa-miR-16-5p, hsa-miR-15b-5p, hsa-miR-195-5p, hsa-miR-424-5p, hsa-miR-497-5p, hsa-miR-194-5p, hsa-miR-204-5p, hsa-miR-211-5p |
| MAGI2-AS3 | *CFL2* | 36 | hsa-miR-212-3p, hsa-miR-132-3p, hsa-miR-302a-3p, hsa-miR-302b-3p, hsa-miR-302c-3p, hsa-miR-302d-3p, hsa-miR-372-3p, hsa-miR-373-3p, hsa-miR-520e, hsa-miR-520a-3p, hsa-miR-520b, hsa-miR-520c-3p, hsa-miR-520d-3p, hsa-miR-302e, hsa-miR-137, hsa-miR-141-3p, hsa-miR-200a-3p, hsa-miR-142-3p, hsa-miR-144-3p, hsa-miR-148a-3p, hsa-miR-152-3p, hsa-miR-148b-3p, hsa-miR-153-3p, hsa-miR-194-5p, hsa-miR-200b-3p, hsa-miR-200c-3p, hsa-miR-429, hsa-miR-23a-3p, hsa-miR-23b-3p, hsa-miR-25-3p, hsa-miR-32-5p, hsa-miR-92a-3p, hsa-miR-363-3p, hsa-miR-367-3p, hsa-miR-92b-3p, hsa-miR-425-5p |
| MAGI2-AS3 | *FGF2* | 8 | hsa-miR-15a-5p, hsa-miR-16-5p, hsa-miR-15b-5p, hsa-miR-195-5p, hsa-miR-424-5p, hsa-miR-497-5p, hsa-miR-129-5p, hsa-miR-499a-5p |
| MAGI2-AS3 | *PLSCR4* | 19 | hsa-miR-302a-3p, hsa-miR-302b-3p, hsa-miR-302c-3p, hsa-miR-302d-3p, hsa-miR-372-3p, hsa-miR-373-3p, hsa-miR-520e, hsa-miR-520a-3p, hsa-miR-520b, hsa-miR-520c-3p, hsa-miR-520d-3p, hsa-miR-302e, hsa-miR-145-5p, hsa-miR-15a-5p, hsa-miR-16-5p, hsa-miR-15b-5p, hsa-miR-195-5p, hsa-miR-424-5p, hsa-miR-497-5p |
| MAGI2-AS3 | *MYLK* | 15 | hsa-miR-302a-3p, hsa-miR-302b-3p, hsa-miR-302c-3p, hsa-miR-302d-3p, hsa-miR-372-3p, hsa-miR-373-3p, hsa-miR-520e, hsa-miR-520a-3p, hsa-miR-520b, hsa-miR-520c-3p, hsa-miR-520d-3p, hsa-miR-302e, hsa-miR-200b-3p, hsa-miR-200c-3p, hsa-miR-429 |
| MAGI2-AS3 | *TNS1* | 18 | hsa-miR-302a-3p, hsa-miR-302b-3p, hsa-miR-302c-3p, hsa-miR-302d-3p, hsa-miR-372-3p, hsa-miR-373-3p, hsa-miR-520e, hsa-miR-520a-3p, hsa-miR-520b, hsa-miR-520c-3p, hsa-miR-520d-3p, hsa-miR-302e, hsa-miR-181a-5p, hsa-miR-181b-5p, hsa-miR-181c-5p, hsa-miR-181d-5p, hsa-miR-4262, hsa-miR-31-5p |
| MIR100HG | *FERMT2* | 21 | hsa-miR-130a-3p, hsa-miR-301a-3p, hsa-miR-130b-3p, hsa-miR-454-3p, hsa-miR-301b-3p, hsa-miR-4295, hsa-miR-3666, hsa-miR-135a-5p, hsa-miR-135b-5p, hsa-miR-138-5p, hsa-miR-15a-5p, hsa-miR-16-5p, hsa-miR-15b-5p, hsa-miR-195-5p, hsa-miR-424-5p, hsa-miR-497-5p, hsa-miR-29a-3p, hsa-miR-29b-3p, hsa-miR-29c-3p, hsa-miR-103a-3p, hsa-miR-107 |
| MIR100HG | *DIXDC1* | 17 | hsa-miR-96-5p, hsa-miR-1271-5p, hsa-miR-143-3p, hsa-miR-145-5p, hsa-miR-155-5p, hsa-miR-15a-5p, hsa-miR-16-5p, hsa-miR-15b-5p, hsa-miR-195-5p, hsa-miR-424-5p, hsa-miR-497-5p, hsa-miR-200b-3p, hsa-miR-200c-3p, hsa-miR-429, hsa-miR-29a-3p, hsa-miR-29b-3p, hsa-miR-29c-3p |
| MIR100HG | *SRPX* | 7 | hsa-miR-130a-3p, hsa-miR-301a-3p, hsa-miR-130b-3p, hsa-miR-454-3p, hsa-miR-301b-3p, hsa-miR-19a-3p, hsa-miR-19b-3p |

*lncRNA, long non-coding ribonucleic acid, SPONGE, Sparse Partial correlation ON Gene Expression; hsa, homo sapiens; miR, mature microRNAs
